# Supplementary material
Source: publisher figshare collection journal article supplement (https://sage.figshare.com/ndownloader/files/15342410)
Supplement: Supplementary file 1 [file 15342410]

**Table A3**: Type III and Type V bolting off different EQ dimensions (unanchored)

|  | **III (Baseline)** | | | **Va (drop M)** | | | **Vb (drop SC)** | | | **Vc (drop UA)** | | | **Vd (drop PD)** | | | **Ve (drop AD)** | | |
| --- | --- | --- | --- | --- | --- | --- | --- | --- | --- | --- | --- | --- | --- | --- | --- | --- | --- | --- |
| **Parameter** | **Coef** | **SE** | **P** | **Coef** | **SE** | **P** | **Coef** | **SE** | **P** | **Coef** | **SE** | **P** | **Coef** | **SE** | **P** | **Coef** | **SE** | **P** |
| M3x D | **-0.032** | 0.006 | 0.000 |  |  |  | **-0.039** | 0.013 | 0.003 | **-0.031** | 0.015 | 0.037 | -0.007 | 0.013 | 0.574 | **-0.054** | 0.014 | 0.000 |
| M5x D | **-0.140** | 0.006 | 0.000 |  |  |  | **-0.159** | 0.014 | 0.000 | **-0.146** | 0.015 | 0.000 | **-0.119** | 0.013 | 0.000 | **-0.174** | 0.015 | 0.000 |
| SC3x D | **-0.030** | 0.006 | 0.000 | **-0.042** | 0.014 | 0.002 |  |  |  | **-0.035** | 0.014 | 0.013 | -0.018 | 0.013 | 0.153 | -0.026 | 0.014 | 0.055 |
| SC5x D | **-0.121** | 0.006 | 0.000 | **-0.187** | 0.014 | 0.000 |  |  |  | **-0.163** | 0.016 | 0.000 | **-0.149** | 0.013 | 0.000 | **-0.139** | 0.014 | 0.000 |
| UA3x D | **-0.036** | 0.006 | 0.000 | **-0.056** | 0.014 | 0.000 | **-0.052** | 0.013 | 0.000 |  |  |  | **-0.045** | 0.013 | 0.001 | **-0.035** | 0.013 | 0.009 |
| UA5x D | **-0.097** | 0.006 | 0.000 | **-0.146** | 0.014 | 0.000 | **-0.134** | 0.013 | 0.000 |  |  |  | **-0.103** | 0.013 | 0.000 | **-0.125** | 0.014 | 0.000 |
| PD3x D | **-0.036** | 0.006 | 0.000 | **-0.051** | 0.015 | 0.001 | 0.002 | 0.013 | 0.868 | **-0.045** | 0.014 | 0.001 |  |  |  | **-0.042** | 0.014 | 0.002 |
| PD5x D | **-0.178** | 0.006 | 0.000 | **-0.199** | 0.014 | 0.000 | **-0.193** | 0.014 | 0.000 | **-0.194** | 0.015 | 0.000 |  |  |  | **-0.239** | 0.016 | 0.000 |
| AD3x D | **-0.041** | 0.006 | 0.000 | **-0.071** | 0.014 | 0.000 | **-0.083** | 0.012 | 0.000 | **-0.032** | 0.013 | 0.012 | **-0.085** | 0.013 | 0.000 |  |  |  |
| AD5x D | **-0.163** | 0.006 | 0.000 | **-0.204** | 0.016 | 0.000 | **-0.213** | 0.015 | 0.000 | **-0.181** | 0.014 | 0.000 | **-0.232** | 0.015 | 0.000 |  |  |  |
| T | **0.394** | 0.019 | 0.000 | **0.383** | 0.042 | 0.000 | **0.363** | 0.038 | 0.000 | **0.376** | 0.047 | 0.000 | **0.450** | 0.041 | 0.000 | **0.379** | 0.016 | 0.000 |
| No of respondents | 700 |  |  | 148 |  |  | 146 |  |  | 150 |  |  | 150 |  |  | 150 |  |  |
| No of choices | 7000 |  |  | 1480 |  |  | 1460 |  |  | 1500 |  |  | 1500 |  |  | 1500 |  |  |
| Log Likelihood | -3353 |  |  | -647 |  |  | -696 |  |  | -658 |  |  | -709 |  |  | -672 |  |  |

Coefficients with p < 0.05 in bold.
